# Supplementary material for: Thread integrated smart-phone imaging facilitates early turning point colorimetric assay for microbes
Source: PubMed Central journal article supplement — RSC Adv. 2020 Jul 17;10(45):26853–61. doi: 10.1039/d0ra05190j (PMC9055509; doi:10.1039/d0ra05190j), 2020-07-17
Supplement: RA-010-D0RA05190J-s001.pdf [file RA-010-D0RA05190J-s001.pdf]

## Supplementary Information

### Thread integrated smart-phone imaging facilitates early turning point colorimetric assay for microbes

Anusha Prabhu<sup>a</sup>, Giri Nandagopal M S<sup>b</sup>, Peralam Yegneswaran Prakash<sup>c,e</sup>, Vijendra Prabhu<sup>a</sup>, Ujjwal Verma<sup>d,e\*</sup>, Naresh Kumar Mani<sup>a,e\*</sup>

<sup>a</sup> Department of Biotechnology, Manipal Institute of Technology, Manipal Academy of Higher Education, Manipal 576104, Karnataka, India.

<sup>b</sup> Department of Mechanical Engineering, Indian Institute of Technology, Kharagpur 721302, India.

<sup>c</sup> Department of Microbiology, Kasturba Medical College Manipal, Manipal Academy of Higher Education, Manipal 576104, Karnataka, India.

<sup>d</sup> Department of Electronics & Communication, Manipal Institute of Technology, Manipal Academy of Higher Education, Manipal 576104, Karnataka, India.

<sup>e</sup> Manipal Center for Infectious Diseases, Prasanna School of Public Health, Manipal Academy of Higher Education, Manipal, Karnataka, India.

**Email:** naresh.mani@manipal.edu, ujjwal.verma@manipal.edu

|                               | <b>Organism</b>         | <b><math>\alpha</math></b> | <b><math>\beta</math></b> | <b><math>\lambda</math></b> |
|-------------------------------|-------------------------|----------------------------|---------------------------|-----------------------------|
| <b>Thread without storage</b> | <i>Candida albicans</i> | 21                         | 16                        | $4 \times 10^{-5}$          |
|                               | <i>E. Coli</i>          | 21                         | 16                        | $4 \times 10^{-5}$          |

**Supplementary Table 1:** Image analysis parameters (Refer Equation 2 and 3).

| <b>Thread-based devices &amp; Smart-Phone imaging</b>  |                |                |                |                |
|--------------------------------------------------------|----------------|----------------|----------------|----------------|
| <b><i>Candida albicans</i> : Detection time (mins)</b> |                |                |                |                |
| <b>Trial</b>                                           | <b>Glucose</b> | <b>Sucrose</b> | <b>Maltose</b> | <b>Lactose</b> |
| <b>1</b>                                               | 600            | --             | 720            | --             |
| <b>2</b>                                               | 630            | --             | 840            | --             |
| <b>3</b>                                               | 600            | --             | 750            | --             |

**Supplementary Table 2:** Detection time of colorimetric assay (3 trials) for *Candida albicans* using thread-devices and Smart-Phone imaging.

| <b>Thread-based devices &amp; Smart-Phone imaging</b>  |                |                |                |                |
|--------------------------------------------------------|----------------|----------------|----------------|----------------|
| <b><i>Escherichia coli</i> : Detection time (mins)</b> |                |                |                |                |
| <b>Trial</b>                                           | <b>Glucose</b> | <b>Sucrose</b> | <b>Maltose</b> | <b>Lactose</b> |
| <b>1</b>                                               | 90             | --             | 120            | 120            |
| <b>2</b>                                               | 120            | --             | 90             | 210            |
| <b>3</b>                                               | 90             | --             | 120            | 150            |

**Supplementary Table 3:** Detection time of colorimetric assay (3 trials) for *Escherichia coli* using thread-devices and Smart-Phone imaging.

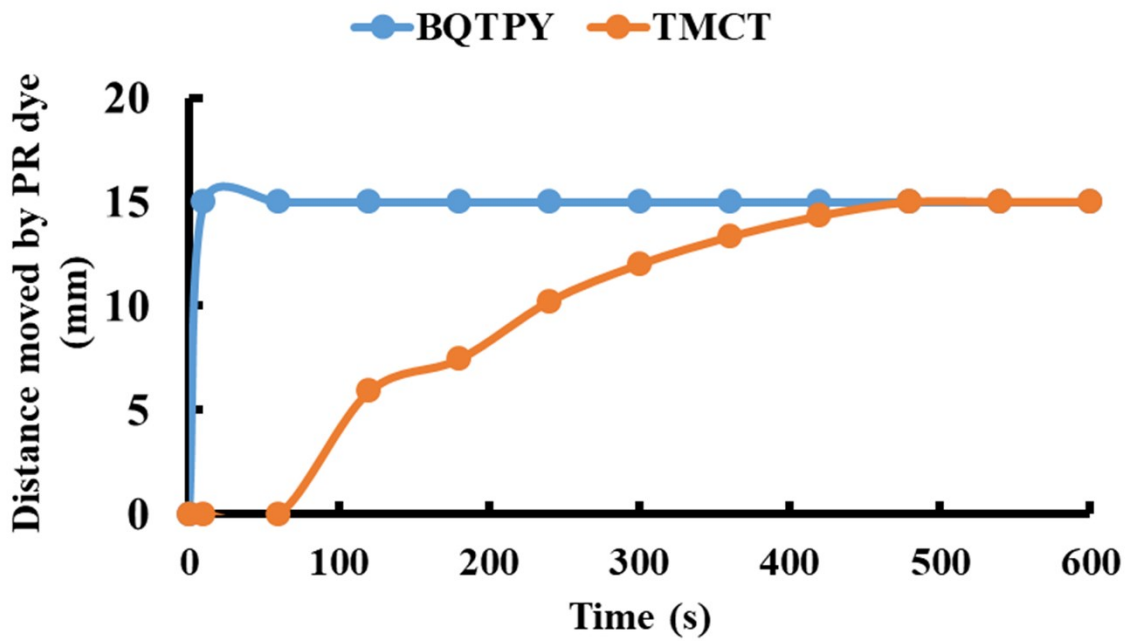

Fig S1: Penetration rate of Phenol Red dye in Best quality twisted polyester yarn and Twisted multifilament cotton thread.

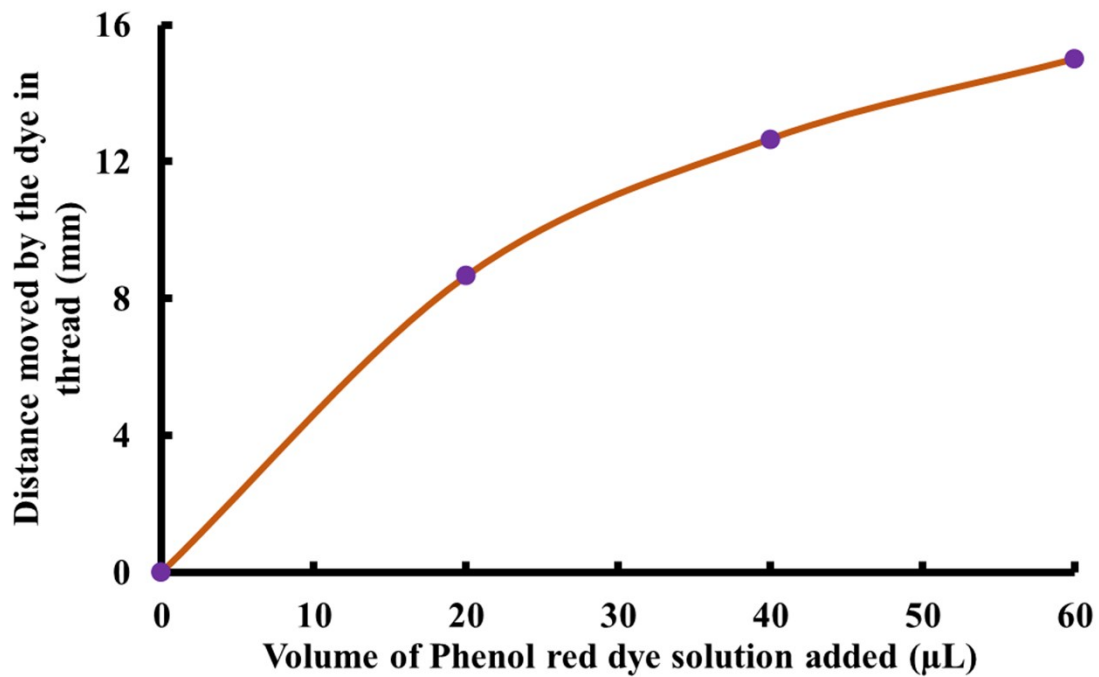

Fig S2: Volume of Phenol Red dye consumed by 15 mm of “Twisted multifilament cotton thread”.

### Thread with phenol red indicator with different pH

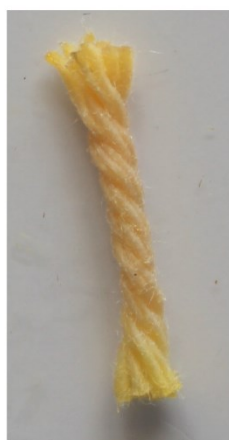

pH 6.5

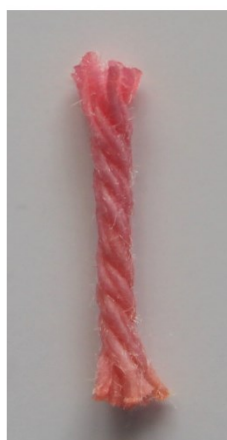

pH 7

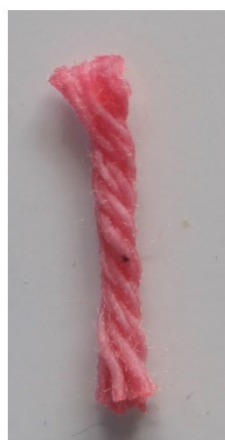

pH 7.4

**Fig S3:** Color change in threads for different pH solution (Thread contents: Media, Phenol red, Standard pH solution).

Threads stored for 20 days (with imbibed media):

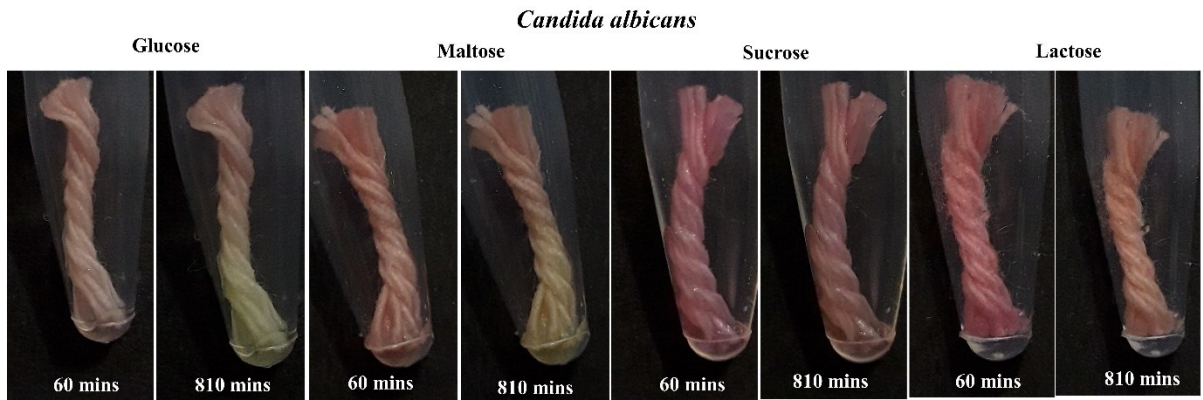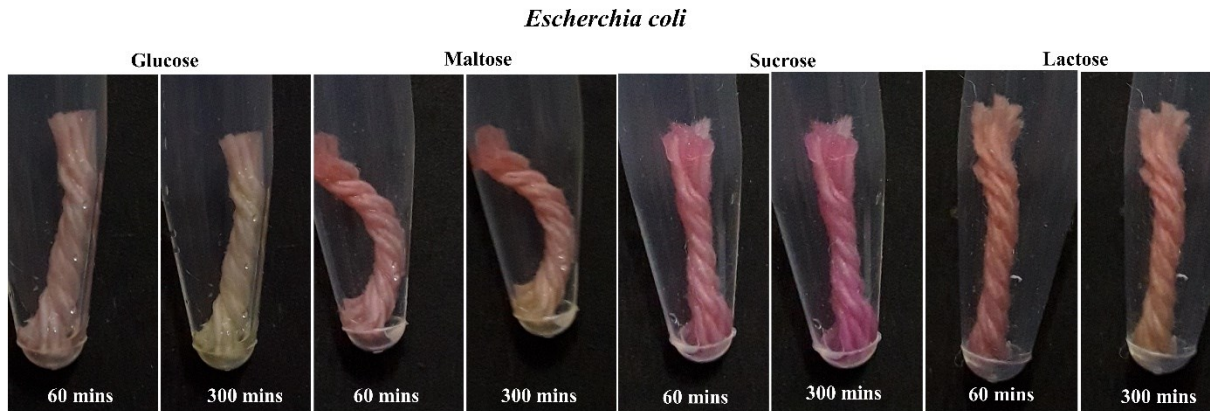

**Fig S4:** Thread-based colorimetric assay of *Candida albicans* and *Escherichia coli* in stored thread device (4°C for 20 days) (a) Glucose (b) Sucrose (c) Maltose (d) Lactose. Yellow colour depicts positive, Red colour depicts negative.

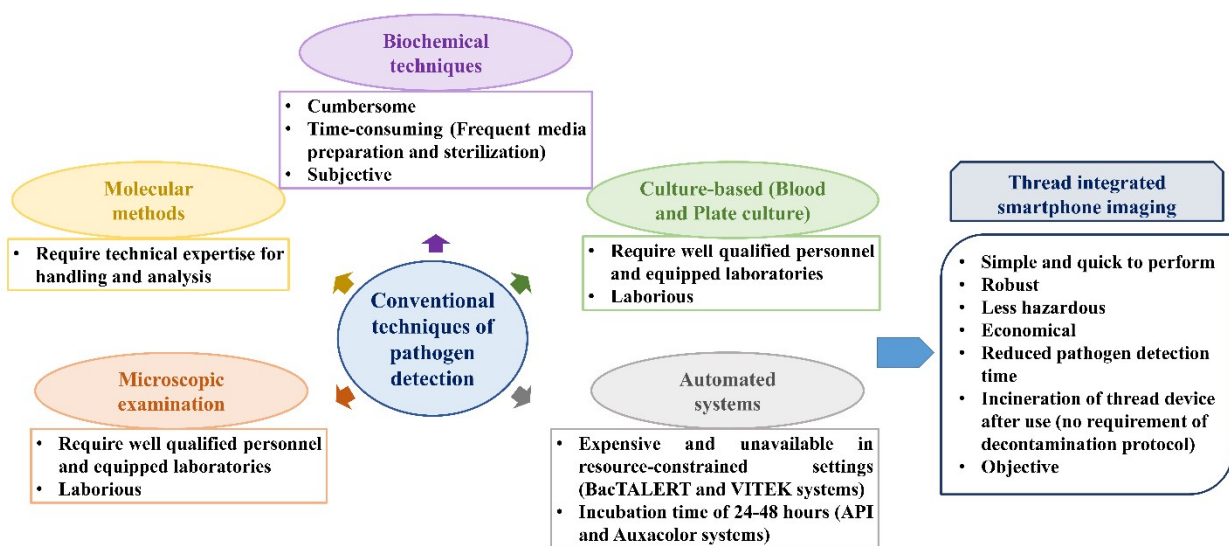

**Fig S5:** Outline of existing methods and thread-based method of microbial identification

**Future Work for colorimetric detection:**

A main challenge in threshold based colorimetric detection is determining the optimal threshold parameter. Experimentation has to be cautiously performed to determine the threshold parameter. A minor experimentation error (due to artefacts) may result in a deviated positive value, as was the case observed in the initial trails of *Candida albicans*. In future, such cases can be addressed by using calibrated color imaging processing techniques, which would eventually reduce the influence of threshold parameter for developing a more efficient system with increased specificity and sensitivity.
